# Supplementary material for: Connectomic analysis of the Drosophila lateral neuron clock cells reveals the synaptic basis of functional pacemaker classes
Source: eLife. 2022 Jun 29;11:e79139. doi: 10.7554/eLife.79139 (PMC9365390; doi:10.7554/eLife.79139)
Supplement: Supplementary file 1. — List of Body IDs of all neurons that provide inputs onto currently identified circadian clock neurons and the weight of those pre-synaptic connections. [file elife-79139-supp1.xls]

## Sheet: Table S1_20220309_clock_pre_con
Supplementary File 1. Inputs to clock neurons
	sLNv-1	sLNv-2	sLNv3	sLNv-4	l-LNv-1	l-LNV-2	l-LNv-3	l-LNv-4	LNd-1	LNd-2	LNd-3	LNd-4	LNd-5	LNd-6	5th LNV	DN1a-1	DN1a-2	DN1pA-1	DN1pA-2	DN1pA-3	DN1pA-4	DN1pA-5	DN1pB-1	DN1pB-2	LPN-1	LPN-2	LPN-3	LPN-4
bodyId_pre	2068801704	1664980698	2007068523	1975347348	1884625521	2065745704	5813001741	5813026773	296544364	448260940	5813064789	5813056917	5813021192	5813069648	511051477	264083994	5813022274	5813010153	324846570	325529237	387944118	387166379	386834269	5813071319	356818551	450034902	480029788	546977514
200326126																3	4
233105330											1		2						1
263475451									2		1													1	2
264083994									1					81	55		10							1	3		1
264822904																							2
265120589																									1
265124786										7	3													1
266187477																								1
266187480									1
266187559																									1
266873389										4
266873401									1	1
266882091									2
266882171									5	5
267210124									4
267210191									5		2
267214250										5	11
267218804									1
267551622										1
294424196											1					4			3
294428266																					1				1
294432626																7		3			1				4
294432760										1
294432807									1
294436967									1	3	2		2			3	3			1			2		4	2	1
294437328										1
294437347																							6	1	1
294441510										2
294445804										6	10					1
294450578										1
294756576																				1
294760699			1							1	5	7	6					6	10	9	6	12		1	2	2	1
294760837										1															1
294774792																			1
294783216				1														2	3	3	2	6
294791509											1
294795963																							1			1
295103172										1
295111734										1
295127956											1
295132845																								1
295133778																						1
295133902																									1
295137019																									1
295137392																		1
295141618																		1
295434457												2
295443136										1	4	10	6										1
295443724										1	1	2	1			2									4
295473947											1
295474250										1	1
295478082										1	2
295482340																								1
295482551										1
295490863																								1
295780154										2	2
295793991			1
295797312										1	6
295802733										7	3	7	2
295807429										1
295814932																									1
295819998																		1
295827899																							2
295828029																											1
295849217																							1
296120593										3	1	1							1	2	1		2	4	4
296139882									2			1														4	5
296164879										2		1				1									1
296168382											2
296199026											2
296199149																										1
296203440													1
296203608											1
296207652																							1
296475214																3
296489073										1
296496999										1						1
296502002										1
296509673																							4	3
296509709			1																				3	1
296543992									3	2	3	1											6	9
296544262				1					5			1	1	1				1	5	1	1	4	1	2
296544364										6	3
296556885									3	2
296832977											1
296837846									1	3	1
296838079																									2
296838734										1	2
296843037										1			1						1	1						1
296846109									1	1
296859438									1				2						1				14	4			1
296885154									3
296885362									2
296889667									4	6
296889776									1
297192193										1
297192204																											1
297196636												1													1
297221971											2												2
297225829									1
297226270										1
297229974									1
297230313									1
297230760									3	2	2													2	1		1
297234448									1
297239186											1
297239209									1
297239231										1
297243542									53	17	28	3													1
297247801													1		3				1							1
297247805									2
297251714											1															8	7
297502392																									2
297520036									1			1
297524212										1	1
297528204									1
297533212											1
297541369	2	2	2	1																			1	1
297558674										1
297558862											3
297562705									1
297563139												6	7														4
297563270									3	2
297571222									3
297572235									1
297579726									1
297584752																							3
297584869									4
297588882										1
297588995									2	1								1						2
297851977									8	6	2					1
297860964									3
297899921									6	3
297908801									3	2
297912117									1			4	3												1
297913231									2															2
297917158										1	2
297917363																									3	1	1
297917475									5	1
297921570										2	1									2						1
297921608																							1
297921642									1
297921808									2
297925478										1	2	4	4	3											1
297925596									2	1								2
297925608																									4	1		1
297925628												3															2
297925742									1
297925765									1
297925887										1
297929807										1
297934028									1
297934049									2
297934346											1
297938108																							4
297938585														1				15	12	12	14	10	8	9	1	17	8
297947227										1		1							1						1		3
298197305									1		2
298201943										3	4
298210543									2	2	4	5	6						2		2	1			1
298245448									5
298249566										1
298249624									2
298249959									4
298254384										1
298254517												15	13												1	10	10	1
298258134									1
298258513													2
298258530																									1
298262357											1
298262408									2									1		1	1	3	5	4		1	3	2
298262442													2													1
298262498									1
298262599															1
298262644									1	6	3														2	1	1
298262663									1		1
298266660									1
298266716										2
298266805										1
298266950											1
298267120										2
298270808									5	1	3										1		2	1
298270909									1
298275024										1
298275090										1
298275356												1
298279629									1	2	1
298547436										2	1
298586567									3		2
298590924										1
298591130									2		1	1
298599269									1	1
298599310									2
298603633										1		1														1
298883439										1	1
298892294									1
298931489									1
298935769											1
298936099										2
298952944										1
298957166																										1
298957344									4
298962041												1
299083134										1
299281053									5
299289475									1
299289811																											1
299290105												2								1					4	1	2
299613271									3	1
299617529													1												3	9	11
299617731									2
299954299									1
299954300									2
300972942																								1
324846570												6	13	37	25			1			1	2	3	1
325113795																		1
325118117			1							1								1	1
325122109										1											1		56	43
325122525										2								19	32	21	10	20
325122802										1
325446181																									1
325455002		1																1	4	1	2	5		1
325455473																				2
325460206										1	1
325472654											1
325489440										1
325490014																									1
325529237										1		5	8	30	33			2	2			1	1				1
325791855																									2
325814461											2					1	4				1			1
325815440																1									1
325839288												1													1
326119769														1			2						1		2
326124243																								1
326128670										1
326134056																				1
326137566										6	2										1
326159907										1
326253554									2			2	2					1				1	9	6	12
326460989												1
326465302											1									1
326474963																									1
326521082																							2
326525255																							1
326530038																							1
326556230									1									1		2	1		1	2	5
326560782												1
326812225										1
326817510									2	12	11							1					13	7	1		1
326875404																								1
326884223																									2
326884250										1	2
326884264										1														1
326888433									1		1
326888609																										1
326888675									1
327147292											1	10	5
327147610										1
327152465										3															2
327158831																	2								9
327242169										2	2
327242287												1									1	1		1	1	2	1
327246381											2
327246931									7	3	6		1					3	2				10	18	1	1
327255181									1	1	2
327255543											1
327506825																									1
327509674										1
327532246										1
327566137																							1
327575026																							1
327587601											1
327588074									21	9	20												1
327588208											1
327588225													1													1
327592562												1						14	6	3	1	8	7	6		1	1
327596481										1
327600366											1
327843160									1	1	2						2	2					1		1		1
327848116																								1
327869598											1
327869910										1
327872615											3
327928411																				2			3	3			2
327933008												1
327933027									1	1				1				1	2					1
327933814											2				1			1						1
327937328									4
327937494									1
327937506											1												12	8		1	1	3
328010530					3	2	2	3	2		1	1	6	1	2			2		2	3	1	4	14	6		1	1
328179117										1		1	1
328213227									1
328257630																									4
328264983									1
328265389										1		19	18											1	4	15	21	2
328273806									7	17	31	1													1
328273858									2
328274706									1	2
328278125									1	1
328278368									1
328283528											1
328291455									1
328524867												1
328533896												1	1
328537891										1
328559607									11	1	1
328563364																							1
328611467										1
328632707																									5	3
328718110										1
328860948											1
328870472									1
328883562											1
328896613									3	1
328900127									1
328905011										3															1		2
328909309				1
328943204																												1
328955898											1
329227987										1
329271369										1
329301513													3												2		1
329310230												11	18											1	4	7	9	2
329561513																									1
329561679										1
329566174																									1
329566197																									1
329732855												5	5														1	1
329928204											1
329966674																1				1		1
330074628										1
330237771												1
330246657									1	6	5														2
330316013																									1	1
330415332												21	18												1
330640044																											1
330661786																									1
330678844													1
330998071									1
331774819																									5			1
355453590	2		3	2														7	15	26	15	13
355816896	1	4	3	2						7	4	1		1						2		1	2	1	7	2	3
356136008									1	2		1	2								1						1
356140100																								2
356144721										1
356153135										1															1		1
356472645			1										1			1		1					46	54
356472660									1	1		1			1		1				2		7	4			1
356490891										1
356494648										1													2
356503889										1	4								3	1		3
356517307																		1							1
356813986																			2		1
356818551													1			1							1			4	2
356823065												1								2	1			1
356832459										2
356835277										2	2														1
357146296											1					1
357150583			2											4		1	1	1				1	7	3		1	1
357163689										1
357482735												3	4	21	11	3	3	3		1	1	1	21	8	5	2	2
357490931																									3
357515217										3	1														2
357522097																									4
357522570																									3
357569116										1
357569231																							3	3
357569240																							2
357573154											2
357581846												1
357595428									1														1
357599074																							8	11	57	1	4
357607932												3	4	26	17			2		1		4	1	1
357814777															1
357823645											1					2
357832762										2
357862532										3	1												3
357863646																									6
357867646										1
357909813																								2
357919199																							1
357923095			2																				6	3	2		4
357932060									1									1	2				5	4		1	3
357940977														1	1			2				2			1	1	2
357944721																							1
357944930										1		1	2										1	5
357945095									3	1	4		3		1			1	1
357945155																									1
357949102															1			1							3	1	5
357949364									2		2
357953145									7	8	8		1						1				1
358197600												1
358264919																1	1						1		1
358281935																									2		3
358281997										2	1		1					1
358285424									7	11	16		2
358286194												1	3						1			1		2			3
358286442			1									1															1
358290727																											1
358290805																									2
358295017											1
358501372												2
358515278														1							1		1			1
358538040																									1
358593042																									3	1	2
358613806																									1
358631295										1	2													1
358631384									4	4	3	10	8
358631450																							1	2
358631537									4	5	12		1
358639742												22	18
358639884									3	11	7													1		1
358847551												1	1												14	7	3
358865451																1
358878546																									3
358899943											1						1
358976440									1	1		1		1				2	1					1
358976515									3	6	10	1
358985893										3		2
359210479												1
359219263																									1
359279388																			1	2	1
359326692									5	10	9	1						1						1
359326764									2
359447314										2										1			2
359555152																									1
359744616										2
359748709									1
359897526										1
360086302												1
360245971										2
360254108									2				1												1
360284300																1	1									1	1
360427529									1	1
360432213									2
360596183																1
360677632																									1
360690414										1
360698817											1
360763630										1
360764170									1
361005850													1											1	4	4	10
361104677										1
361312146										2	1
361363973																									1
361445621												2
361636071										1	1
362127690										1
362394990												1
362473525												14	17			2	3							1	4	3	2
362719326												2													1
386506469									1	1
386821054										1
386829647																								1
386833812									1							6	6	3	1				4	1	2		1
386833850	1	1								1		7	2					1					24	41		3
386834269	3									1	2	3	4	4	2			3		1	3	1		5	8	1
386838513												1				6	3								2
386838814										1
386842280																	1
386847799																										1
386872886																		3
387166379												8	5	30	25			1	1	2	1			1		1
387170738																	1								1	1
387180498										1		3	2			1		2	4	2	1	2			1	1
387215056																		2
387503511																										1	1
387870860																	3
387943673												1
387944118												2	2	34	22			1	1								2
387952104													1				1						1
388284324																								2
388289013																											1
388293131												1	1
388297625												1	1		5							1	2	1			4
388625791																							1
388638672									2			48	22					4	2			3			1	1	1
388854495											1		1
388859011										1
388877336																							1
388881226										1						19	10								1
388954086												1													2		2
388975834											2															1	1
388984132												3	5		2								2	1	19	25	5
389195896													1	1				1					2	4
389199936												9	3			13	21	11	3		5	10		1	1
389204929										2
389217959										1
389251578											1
389325067									1	2
389527383																					1		2	2	1
389536926																	1					6			15	5	1
389545760												3
389546522													1
389563849											1												4	3
389657555									1				3			1									3	10	10
389687699									3		3
390024952										1															1
390097431									1
390271275																									3
390279635																	1								1
390331583												7	7														1
390344371													1						1			1		1	5
390356988											1
390366259									1
390378650																		1	1	2	1		4	1
390442730									2	1
390443308									1
390560212																		1	1
390579059																									1
390590450																									1	7	1
390641665										1															1		1
390702220									1													1	1
390706983									1	1	1
390779805										2
390784054										1
390918452													1
391026123										1											2				1	1
391034580																		5	2		3	3		1
391052159													2
391120561										5									1
391362634												1
391462340									1
391802788									1
391971839																									1
392057736																										1
392130578																									3
392325925										1	5
392411222																											1
392490012									1
392821837										8	5
392822059												1	1
393063351												1	2												10	11	12	6
393776005																									36	1	5	5
417143726												1	2												14	20	18
417190793		1								1						1		1	1	3	4	5			1	1
417199910																		1					4	1
417204164																							1
417204354																5	7		1				6	6	1	1	4
417221397																		1						1
417536905									1	2	1								1					1
417540543															2	5	6			1	1	3		1	1
417550216												10	9	1			1	1			1		1	1	4
417554004																								2
417554241																1
417558532													1			14	13
417882515																					1
417890128																8	14							2
417908800												6	8												1	1
418205694										4			1					2	3		2	2
418214549																									1
418224293																						1				3
418224351			2									1											1		3	1
418261858											1
418607328																									2
418641700											1	1		1									2	3	1	2	3
418650351												14	15	4	4			7	6	7	7	7
418870503																									1
418888180										1
418991065																								1
419000001												11	5	18	19			1			2	4				4	1
419345606												4	1		2			3							15	55	56
419466429									1			5	6	1	1							1			19	1	2	34
419669180																		1	4		1	2	7
419908058												2
420010560																					1					1
420027427	1		1							2	3		1				1	2	2			1	1			1
420036032											1							1
420036071																		1
420221276										2		2	3			1	1	3	4	3	5	2	1		1
420239937												3
420347328									1			1											2	14	4	2	3
420347360										2
420351087																											1
420351828									1		1	3	2													1	1
420382647												2						2	2	4	2	1	11	5
420386244																										1
420455015																			1			1
420567894																									2
420581268												1
420586101												1															1
420666689										1
420799910											1							3		2	4	2	3
420908078																	1									1
421054850	1								1
421055181											1
421405157																										1
421477693										1
421477870														1					1
421605182									1		2
421814868										1
421819939										1
421946059										1															1
422151816										1
422156333										1
422286752										1
422419397															1											1
422622063													1													1
422674339										1
422751191																									1
423101189												3	2												18	32	35
423852469																									1
424793122											1
425143700											1
425148091																									33	5	3	7
425484071									2
425790257																1									1
448182402			2										1		1	1							1
448234999									1		1							1		1		2
448238871									1				1	1	1				1		1
448260940									3		3										1
448515267									2										1						6	2
448908723													1
448912981												2	1												1
448942604										1
448943882										1						3	2									1
448994377																	1
449250041																										1
449288517																									4
449289591										1																1
449331241	2			1														5	6	7		7	28	8			1
449335798																		4	2	1		5	2	2	1	3	7
449339532																			1		1
449339838											1							2			1					1
449490682												1
449490694															2					1
449555633																		2
449568880										1
449634200										1									1	1	4	4					1
449634539																1	1									1
449668199											1												1
449681157			1	1										1		3	1	3					1		13	9	12
449685246																		1
449685778													2
449901277										1	1
449905648																										1
449910481									2			6	10					1	2	1	2	4	6	2			1
449910491											1
449975227										1															1		2
450008671																	1				1		1
450026507	1			1										1				6	4	4	2	3	7	15
450034902												2	2		1			1		1	1	1	1	1	2		30
450047573												3			2							1
450155802																				1
450160102																				1
450285679										1															1
450354788												1			1		1						1		1	1	1
450371612																									1
450497356																											1
450583886												20	22	20	12	18	11		1						25	7	5
450597298																											2
450700075											2	4	2		1			1	1					1	5
450807268																												1
451040974																									7	4	4
451054039																							6	3	27	1		28
451071417																		2								1	1
451080648																			1							2	4
451084400																					1
451148412																			1		2
451279196												1						1				1	1	1		1
451365099																										1
451382570																										1
451390676													1												5
451412500											1
451424866												5	2	8	4	1		2				1		1	2		1
451485030																										1
451485461										1
451489835																		1		1		1
451602687																1	2
451662040												4													1
451689001																		1			2	3
451722668													1											1	1
451762072															2				1		1	3	1			15	8
452167805										1
452171673										4
452401052										3
452504314																					1
452771533											1	1						1		1	2		2			4
452771913												1	6					1	5	1		1
452841019												1	1
452953198												4	1	1
452971138																								1
453009665										1
453108601																									1
453130054												18	19															1
453185918										6
453320065												3	1
453436589																		1				2					2
453457927											2
453467404											1
453527730												21	16	1												2	1	1
454386099												2	1
454481372																									8
454887480									1
454935401																							1
455172836										1			2
455513316																									1			1
455910660									1
477918443				1											1
478618011																							1	1
478928628		1														84	76										4
478937243									4	3	17
479260921									4	1	1	1											1	2
479269268																			1
479290982														2		9	10	1				1	1	1	1	1
479637825													1
479645393													3														1
479908437												2
479912666												1
479921537																	1						1			1
479987085											3	1	4			1	1				1		7	4	1	2	3
480029788													2					1			1		1		3	45
480276374																									2
480328501																									1
480331310																2	1
480371354																					1				1
480387478																										1	1
480391822									1	2		9	2					3			1	1	1		22	14	5
480521586																		1		2		1	4	9		1
480525449															1
480590337																											2
480590566																6	11									2
480590606																		1
480595244											1
480681197												1	1											1
480698453									2		6
480737286														1	3				3	4						11	10
480854134															1							1						3
480863095															1
480866929																						1
480923210										2															1
480945354																											1
480978811																									1
480987689													1
481034861												1
481053136																		3	2	1					2	8	9
481056857	2																	6	5	10		1	9	8
481070027											1	12	24												2
481190355																					1
481199594												1									1
481286239												1	1
481406868												2													1	1
481410841															1
481427934											1								1		1	4
481501144															1			1	3	3		1				6	2
481657750																											2
481747302												7	9
481770433																											2
481838035																				1	1
482050067																		1	2	1
482071463									1
482178905																									1
482178967																					2
482179179														1
482183354										2					1			4	1		4
482183384												11	8	18	36			3		1		1		3
482511406												8	4	2	2			2								1	1
482520165											1								1
482637370													3
482754144																									8
482757982																										1	1
482801075																			1
482805831									2															1
482852299																		6	3			7
482852401																											2
482852469																					1
482866008																												3
483189268																		1	9	8	6	13	3	8
483324087												1
483337285										2														1
483646991												1
483720758																									1
483750501																								1
483880436																		1			1				1	1
484005994																									1
484134987																								1
484355328													1
484501839												1													1
484562428												6	1
484829654												2													20	4	6	22
484838760										1				1											1		1
484911881																												1
484911954													1
485171425												2													11	5	3	12
485252796													1
485511772									4	6	13	1	1							1			1		3	3	2	1
485572658										1
485930943												1																2
485934965												6	2												11	13	16	10
487100556												11	3
487286529													1															1
487541595																									1
487882168																									1
487899426																									1
488240010																									2
488572496													1
509626405			1													1	1						5	6
509631101										1			1		1			2	1		1			1
509643775									1	1	2				1					1			4	7		2
509993739										2			1				1				2
510602264																											2
510680365																										1
511051477	1	1	3	1							1	18	25	40		3	3	9	8	12	9	14	3	1	4	1	2
511349908																							1
511358390																									1		1
511392837																							1
511397372																								1			1
511547921																						1
511556617																				1		3
511561131											1	3	1					1	4	2	5	1	2	5
511561200												1	1
511617404										1
511634742											1
511685969																											1
511699812	3	1	1	2
511733723															1
511772101										1	1	1	3						1	1						2	2
511862444																				1
511875377														1				1			1	2
511875414																		1
511875446																		1
511879849																		1
511966686																3
512014262										1		1	2														1
512048416									1		4												7	1
512079523									1	4	4							1			1		1
512203512														4	1
512207845													1
512212113												1		3	1
512212142																						2
512216491																		1				3
512225867																		1	4
512416525																										2
512441111																										1
512535936																				1		1
512536036																					4
512557531																						2
512774096												1								2
512787296												1
513209724																					2
513209805																		1	1		1	1
513218419									1
513339129													1
513344531												1
513464860																						1
513546661																		1			1	1
513551146																		3	2	1	3	6
513555436	3																	15	5	8	4	9	16	11
513668146													1
513681077													1												2
513788774																											1
513840103												1			1											1
513848395																									1	1	2
513896195														1
514017455												2	1
514068564																	1										1
514219793																									2
514224681													1	1				1				1
514272175																									1	2
514527219									1					1							1
514859045														1	1					1	1
515247907													1
515385637									1	2		3	5		1		5	5	3	4	4	2	21	24	3
515580115											1
515588291												2
515718803												1
515925122												1		1				2					1
515938625													1
515947324												2																9
516055524										1	1	1	3	3	1			1		3	7	3	4	6
516288120													1
516288489																												6
516409549												2	3
516875221																										1
516943720									1	1
517086196													2
517242832												1														2
517506265																	1
518217691																									1
518580489																									3
518899771																									1
518925962													1
518947623																												2
520414997																												1
520613226										1
540325242																				1		1	5	3		3	3
540329317											1								1
540657374																18	28							1
540662210											1									2	2	1
540674783												32	26	85	41					1		2	1		2	8
540679089																									1	2
540998783																10	30
540998882	1		1													3	1	2							15	19	12
541007502																		1	1			2
541019599																					2		2
541373868											1					1								1	1
541378802		1		1									1				1								23	10	7
541391609														3
541681271																	1
541697718															2	1							1			1
541723731													1
541913280												1
542056766														2		2	1					1
542068823													1
542457618									1
542691005													1
542798778																							1
542802879																			1
542807704																							1
542897839														2
542902050																			1
542902307															1
543010474										3		2		1		7	10				1				1
543023799																									1
543049093												1	1
543062097															2
543135607												1													11		1
543234243												1
543238468												2			2													2
543247668													1
543247684																				1
543251883																			2
543252056																					2	2
543256347																												3
543260688												1	1
543365167												2	2			9	7	3		4		2			2	2	7
543369332												1
543566744												4						1							6	1
543571255																		2	4	7	1	5
543580198												1
543583770																			1
543584523																			1			1			1		1
543692985														5	1											1
543702186														3	4
543718301												1
543804534																										2
543808842																												1
543821838																											1
543916401																		1			1
543925435													1
543929121																			1
543934429																												1
544038013												2
544158940																											1
544184932											1	1												4
544249161												1
544262349																												1
544265926																												2
544379269												2	1
544599014																												1
544606883																												1
544606915																						3
544620289														1
544699051																									1
544939871												1	4
544943733									1
545224254																		1	2	2	1	1
545284807										1
545510060																								1
545535468												4	4
545625824													3
545748103												2	2				1	1		1		1
545906392									1	1
545907195													1		1			1			1					7	4
545966796												3
545971090													2
546217818													1												15	2	3
546312597																												2
546917498											2
546925626									3	1	5													10
546981769																												1
547439565												1	1
547612423										1
547918570																		2	2	2		1				2	4
547927681										1
547978595									1	3	1													1
548367533																												1
548367551																												1
548377264																												1
548704181																												1
548712377																									2			1
548955060												2	7
549282467												1
549377313																										1
549381505																												1
549597974																								1
549611256												2
549714149																												3
550033958											1
550063586																												2
550297695														1													2
550326974																									1		1
550408962																												1
550617370																									1
550758596																												1
550953198									3
551086679																												1
551095302																												1
571346887													1
571355851														2
571364144											7
571364778			3											1		1							2	1
571368849										2		4	1	1	2			6	5	7	4	10	1		1		1
571372889												3	2				1								19	20	11
571692115										2														1
571692839				1
571709547										2	1												1	3
571713905										1												1	3	5	1	1
571717923																								2
571726583		1																						1
572046627																	1
572050535																	1								1	2
572408934													1										2		1	20	27
572754751																											2
573090850																2	3								1
573142557			1																1
573143028																								1
573289509															1										2	1
573381453												1
573415212												1
573774122														5		7	6
574062996												3	3	6	2			1	1	1	2			2	3		1
574260596																						1
574395611													1										2		2		2
574511458												19	24												2
574688051																	2
574740549															1
574938221																					1
574973454													1
575063620																									1
575073147												1
575206067											1
575301459												1	5
575323308													1
575327207																										3	2
575651309												1	4
576082257																									1
576260070									1	1	5							3
576574889																											1
576597029																								1
577244511													2												1
577304838																					1
577330676																										1
577554935													1
577645883																			1
578284233																									6	1
578284872																									1
578686468													1
578811223												1
578919867														1
579014562											2
579666216									2		1
579695775										1
580010810											2
580714587																									1
580745387				1						1	1	3
581073524																									1			3
601712799				3											1	1			1						1
601712813			3									2		1							1		3
601716965			1										1	1	1		1						1
602044790																1
602071049	1
602382052														1	1						1
602399280																			4	1
602675369										1							3						4	2
603089654																				2
603095061																								1
603465268																		2
603466235									1		1												1		1
603482385	1																								1	6	5
603755188																									1
603785283												2	5	5	1								1	4		2	3
603810512										2
603810673											1
604161217										1
604194925		1																								3
604460198																	1
604476368																									1
604510234													1
604825724																							1
604847018																									1
604864392																									1			1
604889732										1													1
604976663																												1
604989814																												1
605554875													4
605775210														18	8
605999323												1
606944503																			1
607264357																									2
607273128													1													2
607273339																										1
607294784																		1			1
607597135												1
607929192												23	18									1					1
607955261												1
607998424																					2	1
608377992																												1
608715651																												11
609384016																									1
609384093													1															1
609587511																									1
609655670												1
609656444													1
609660480												1													2
609997539																												1
610074665																												1
610558436									2			2	6
610666582																									1
610670860													1
610704870									2		1
611016455																												1
611067721									3
611089612																												16
611340150																											1
611357256																									1			1
611706830																									1
611974080																	1
633097767										1		1					1
633097828																10	13								1
633101926																									1
633412404																							1
633434319			1
633438933																30	24									1
633447561											1				1											2
633793553										2		1					1									2	1
634090169																									1
634138422													1
634759240																	2
634879889																								1
635109166																	1
635424442										1
635523991																								2	1	12	14
635541640													2		3										1
635890732																							1			1
635895000												1	1												8	16	17
636344136														1
636701737																												1
636944318												1
637008792												8	6														1
637306291	1									2	1		4		1			9	3	6	7	5	5	4		4
637673302																		3		1	4	1
637914938		3														4	1
638040562																										1
638355885																				1
638481581																	1
638985608																									1
639327084																									6
639650941												1
639694375																		1						1
640082371																												4
640337151																									1
640539567												1
640755994												1
640760406													1															2
640877406																				1
641481132																												1
642046803																									1
642422617									1
642651049																									2
662197764													1		1
663432544																161	139
664447502																						1				1
664456036																									1	4
664473327																	1
664824047																1	1
665164021																									1
665181585																								1
665190290																								1
665191303																								1
665194717																								1
665552356										2	2
666212865																										1
666230992																									1	1
666252297													1	3	5	7	3
666503184																											1
666567261																											1
666904390																										2
666916874																									1
668340913									4	26	14	4	7	1	1	4	1			1
668397992																					1
669171261										2						4
669675454																									6
669726929																			1
669744300												1
670020922													1
670094261																												7
670348810																									1
670370149													1												2
670370239																											1
670370808																									7
670431030												1																1
670772147												1																1
670776253																												6
670776480																												7
671234167												1													1
671574812												1
671751354																												1
672041363																									1
673639143													4
673867858												1
674108632												12	15
675166212													1
694471913																5	2
694472338																33	20
694472667																1	1
694813676																23	33								1
694834412																											1
695124651							1					13	15	6	4		1				2	1		1			1
695128320													2				1
695132361												2	3	8	5						1		2
695163759																											1
695167675																1
695508439																	1
695875649																									1
696489026																				1					1
696829800																						1			2	4	1
696830498									1		1	8	10						2		6		5	2
696846594																							1
696850811													1			1							1
696863848												2		1
696881909														5	2
697252464										1	2		1					1		1	4	3	1				1
697265869														1
697537598										1
697645622				1											1												2
697891313													1
697891769																									1
698418398																												1
698418640												2
698508565																	2
698970725																28	11								1
698979607												2	4
699031185				1	4	3	1	3															1
699035090																							1
699035753																							1				2
699363923													1
699652692																1
699687305												16	19
700002191																								1
700878295																1
701077130															1
701469455																												1
701815778													1
702152113												11	10												1
702497335													2
703145276										1
703296640													2
703623655																								1
703857647																												1
703866010													2
724820565																1
725498630																4	3
725839388																1	6								3		1
726207450																20	30
726858507																2
726918599																									2
726918990																	1
727182822										1
727225324																									2
727260771										1	1								1
727280915									2															1
727285326																		1							1		1
728230740												4
728633073																7	2										1
728926409																											1
729698667													1
729798521																												1
729957687															1
730118077																												2
730131007												2
731062953																									1
731145160												1	1
731494823												2
732034061																1
732478552																						1
733292029												4	3
733458828																							1
734491001												1
734677385												1	1
735008444													1
735699469													1
735798583																									1
736860990												1
737491062																1	1
739917109																								1
756502912	1							1						1
756870190																4
756874510																1	3
757215581																4	2
757374944																	1
757530901												2		2
757556799																1	1
758320421																									1
758903321																	2
758955666													1
758989937																											1
759582005																4	2
759632919															3	38	25
759810119	1															1	2									2	1
759814218																											1
760522417																	1
760638547																									2
760733959												1
760828908												1
761182838												2	1
761489398													2
761494051												2
761838951													3
761843188												1
762176004												1
763435729																							1
764817903																									1
766385396												1
766389431												1
766734991												1
767473384													1
769544445																								1
787227302																2	2
787563782																1
787564302																8	3
787882939	1	3		2										1				3		1	7	2	6	1
787883174												1	2	3							4	1		1	8	13	13
787883482													1	1				1			4	2	1		4	9	18
787904798																1
787908929																9	4
787909611																	1
789330613										1	1								1		1	1	1		1	26	19
789851418																				1
789934899																	1
790305346																	1
791738711																		1	3		2	1	1	1			1
792692885										1						1	3				1		1		2		1
794104770																	1
794574805													1
795546494	1		1	1
796733296												4	1
801257348																									1
818577473			1									1	1	1	1						1		3
818931040																1								1
819992660													1
820015203																											1
820334823																									1
821007911														2
821702605													1
821780859															1												1
822833681												1
823063281															2
824115747												1	1
827262627																										1
828282250											3	3	2
829141094															1
849270788									1	4	2	4	5	1	1	1	2	5	2	6	14	11	33	34
849612438	2	1	1										2	1									3
850294342																2
850703925																	1
850717220												1		3	1		1						4	1	1
851459972														1		2	1		1				1		3		2
851727478																									1
852046834														4
853376855																1
853717974																	1
853726809																	2
853791166												1	2
855043038										1
859006021												2
859152863												1	1
859265651																									2
880305613			2
880987657												4		3		10	12								1
880987844														1		3	1
884140963												1	1
886130319																	2
889497360												1
890883360												1
911332304					3	5		1						37	55		1
911681895																1
912045178																4	2
912398383																	1
912601209														1
914492772													1
914492942												1	1		1
915511932													1	1	2								1
915852626														1
915866098													1
917656984																								2
921589471													1
921935093												4
921939924												1
922595498													1
943071287																3	2
943822621					1			1							1
944146138															1												1
945161760																										1
946204816												2	2
946214177															1
946546270												1	4												1
946550009														1
947193705												1
948363764															1
948812702																									3
949045811													1		1
950229431																							1
950591319																									3
951738965																									1
951934694									1
952792408											1	1
973423536																1
974498400														2	1
974498428														2	1
974498485														9	3
974498491														10	2
974498492														1	1
974839580														2	1			1		1	3			1	14	24	20
974839683															3
974843957														14	14		5
975872458																									1
976730002																										1
977710985																								1
977934593																											3
978336888																							1
982110108																							1
982994156																								1
983146199																		1		2	1
984018803																								1
987759904																								1
1005102825																									1
1005119041												1
1005174948														1				1			2				5	8	10
1005520576														1
1005542502														1	1
1005857873																	1
1005857944																									1		1
1006199303																										1
1006539760														2	2
1007402796													1													1
1010731508																							1	1
1014327691												1
1036546847														4
1036550962										3	1													1
1036637638																								1
1037915305														1
1041541944																												1
1042495376																							2	1
1046039987																							1
1046385221																							2
1046726043																							1
1046726280																							2
1047075623																								1
1047412496																							1
1047425857																							1
1066511487					1		1					28	28	135	63	7	10	1		4	7		1	2	3	3	1
1072063538												1		5	3		1								1
1072805036																								1
1076724912																							4	3
1077122311																								1
1077415831																							1
1077415919																							2	1
1077420174																							2	2
1077756731																							1
1077756950																								1
1077761277																								1
1077761302																							5	3
1078102419																							1
1078102490																								1
1078443080																							2	1
1078447707																							4	5
1078788519																							1
1096872469																								1
1096959028														2
1104004164																							1	1
1107081827																									1
1107423142																							1
1107423158																								1
1107764206																							1	1
1108109641																							1
1108109684																							1
1108113869																							3	1
1108446169																								1
1108809626																							1	1
1109478369																							1
1109832699																							1	1
1110173530																							1
1110173958																							1	1
1127635306															3
1127640198														2
1127886209												1	2	14	6		2
1127894310												1	1	12	5	1
1127894824												3	1	14	8	1	2								1
1128227087															1
1128274593												1		6	17								1
1128572709																							1
1128573330														1	1
1129033939														1		2
1129306180														1
1137081105																							1	1
1137767646																							3	3
1137767694																							2	4
1137767724																								2
1137780791																							1
1138453934																							3	2
1138462517																							2
1138807874																							1
1139144718																							2	1
1139494179																								1
1139826933																								2
1140012085																								1
1140168071																							1
1140176410																							3
1140180513																							1
1140188920																							1
1140853994																							1
1140863129																							2	1
1141035086									3
1141545043																							1
1158631810					1
1158635682																							2
1158636183														1
1158644769					1
1158657609															1
1159262075								2
1159607159														1
1159607813														4
1159607872														2
1159611751														1
1159611765														3	2
1159611828														1
1159948125														1	1
1159952969															1
1159953225															2
1167779265																							1
1169169208																										1
1170179364																							1
1170866180																							1
1172929315																							3
1190339995														5	3		2
1190340083														3	2
1190344036	1															1
1190638276															1
1190668746																									7
1198132041															1
1199491728																								1
1200178237																								1
1200527805																							1
1202250779																							1
1203774508																										1
1220049442																							3
1225605932																							2
1226029612						2									1
1231213221																							3	2
1234662524																							1
1252409535							2
1283405893	1															2	5
1283406432				2	25	19	24	29						14	33
1284117939																9	2
1284373356																	2
1313115480								1							1		1
1313248733																									1
1313538112						2		1
1313733623														1
1314130144															2
1315469002														4
1317130193														2	2
1317471331														1	1
1320177531														1			1
1344828428															1
1345164753							2	1
1345493520														1		5	2
1346477190																								2
1346814892					6		2	4				2		2	3	1
1347638401															1	4	3
1348510469														6	4
1348510522													1	5
1375206889																										1
1375841046															1
1376203864															1
1378182447														1
1378212488					5	1	3	12						27	26
1383292291																							1
1407558431																1
1414327340																							1
1418618235			2	2			2								1
1436335458														1
1439621300		1						3
1448118399													1
1467374847														1
1481736987														1	4			1	2			1				2	1
1498410212														1
1501332510					23	8	15	21						19	24
1501392572																							1	2
1505209641							1										1
1512246869												1
1535709211					1		2	2
1563419167					1		1								2
1563929167		1	1		3	1	2	2						1	1
1570684665																1	5
1594117455					23	14	22	31						8	9
1622540715						1
1625139569																1
1653234875							1	1
1656523777							1
1664980698	6		3	1
1670597454																8	6		2		1		2	3
1671608112																4	1
1684256618																	1
1692278031																							3
1693486219																	1
1702306047																1	2
1727979406																	2
1749628974				2				10							1
1781687187														1
1810654510																							1
1812380613															1
1838364577																1
1849683877																1
1850024931																1
1858901026												1				117	88								58	29	34
1870241189							1
1874450213														1
1881059780																2											1
1881193508					5		2
1881401277												1	1				1									1
1881751117																	1
1884625521						1	2	1							1
1887163927																	1
1910886083														1	4
1912436017																										7	8
1912789965																	1
1917866877																	1
1937164446																								1
1941243752																							2	4
1941925302															1
1943811736																6	4
1943812176																2	2								1		1
1943950268							3
1944502935																4	2
1948107641																1	2
1962171889							1
1968215498												1
1974846717																							3			3	1
1975187675																11	11
1975347348	3		5
1975878958																69	90
2000606012																							3
2004665019							1
2005005494					1
2007068523	3	5		5																				1
2007725158							1							1
2008061833	4	4	4		19	7	19	17						1
2024906500					2
2031343357																	1
2035708242					2			2
2036048508					1
2036730835				1	4	2	2	5
2037067448								3						1
2038082105					3	1	2
2039096834					5	1	2	3							2
2039100722			1		1	3	1	1
2064165421																	1
2064713562																							2	1
2065745704					3		1	1
2067088743					1			1						1
2067748663															2
2068443690					1
2068780445						2		2
2068801704		4	5	9						1													1	1
2069117095	1	1	3		16	11	17	14							3
2069648663																1	3
2094397733																							4	2
2097462638					1		1	2						9	16
2098791953							1
2098796739					1			3
2099141470					1
2099146512	3	3	1	1	17	5	15	8
2128838418							1
2129848864	3	3	1		5	3	9	6
2130509045								3
2155478189					1
2157831742																1
2161190280					1
2221273723								1
2222612442																1
2254986534					1
2289223313																							1	1
2315060417					3			2
5812979048					1			1						1		1
5812979935												1										1
5812979938										1	1
5812979995										1
5812980006										17	13	1						1			1			1			1
5812980010												1													14	6	2
5812980016											1
5812980024																									1
5812980047			2												1
5812980079									1
5812980142									1	6	8	8	4
5812980250	2	1	5	3					1	1	4	4	2						3	2	8	3		1	2	3
5812980253																								1	1
5812980270										2	1
5812980289									1						1	12	3									1
5812980316			2
5812980473												2
5812980494												2
5812980501																							1
5812980507													4	4	2										1		1
5812980513											3						3								1
5812980662								1						14	19		2
5812980673												1
5812980710															1												1
5812980742									1
5812980884													1								1
5812980982			2
5812980984											1
5812981000													1
5812981016												1	1			10	3							1
5812981228													1
5812981237																										4	2
5812981460												30	32	135	83	6	8	1			3	2	1	3	3	1
5812981506																										1
5812981517																										1
5812981643																						1
5812981715			2	2											4
5812981763														2	1
5812982241														1
5812982278														1	2										1
5812982324												4	2												1	10	7
5812982566														1	3
5812982573				1
5812982574														1
5812982632																			2	3
5812983533																							1
5812983721														1
5812983722														1
5812983942														2	2
5812983943															1
5812986257																								1
5812986871																								1
5812987418														2
5812987907														1
5812988181																							1
5812990740																							1
5812994948												1
5812995141													1
5812995298																6	1	1	5	1	1	1	5	8	2
5812996678					5			1								1	1
5812996681			1		1	7	3
5812996748																		1						1	1
5812997016							2
5813000129					1		1	2
5813000891						1		1
5813001741					3	1									2
5813002641												1
5813002721					2	2	5	1
5813002722			1		5	4	9	2
5813002810																		1				4
5813002827																						1
5813002832																		1
5813005406					1
5813007108												3	1											1	2	5	3
5813008796																							1
5813008892																						1			4
5813008911										1
5813008919										2
5813008924									4	2
5813008983									1	2	1
5813009260																								1
5813009352										2	1
5813009378												1	2	1									1
5813009391										5	2
5813009449												2	1			1
5813009486										1		1						2
5813009496									2		2
5813009497										1
5813009500									4	1	4
5813009589																											1
5813009609									2
5813009670									1
5813009676									2
5813009705									5
5813009725													1	1
5813009749														3
5813009781										1
5813009791										1
5813009845												1										1				1	1
5813009881									1
5813009882									2
5813009905											1
5813009946										1
5813010120													1										1	1
5813010121																							1
5813010135																							1
5813010139				2										1	1									1
5813010153												9	6	15	25				1		1	2		2	1	4	1
5813010376													1				2	1					1	2		1
5813010377																							1
5813010385																							3	1
5813010435																		1						1	2
5813010448									1
5813010489													2
5813010682																						1	2	3
5813010683	1	1		1							1							8	9	6	4	2	3	4	1
5813010690												1		1				2		3		3	1	1	2		1
5813010721													1
5813010738																		1
5813010766									1		1
5813010770																1	1
5813010948																									1
5813010996																				2
5813011015										2	1												1	3			2
5813011061																											1
5813011066									1
5813011067																												1
5813011133																									1
5813011327																				1
5813011384																					1
5813011423												2	2
5813011483												2
5813011660					1					1	3														1
5813011683					42	14	26	46						15	48	1
5813011709																				1		1
5813011717												2
5813012028																									1
5813012048																									1
5813012053													4	11	6									3
5813012126																												1
5813012366																									6	3
5813012781																2	1
5813013091																			1							1
5813013185																												3
5813013237													1
5813013436																							1
5813013965												1
5813014166																2
5813014218																3	9
5813014572					1			1						2	1	1								1			2
5813014615												1	2
5813014765												1
5813014910			1
5813014911													1
5813016450																	1
5813016743															2
5813017614														6	4
5813019487									2																1
5813019517										1
5813019526									2	1	2	2
5813019528																									1	1	1
5813019543																							1
5813019567									1
5813019724														16	5								1	1
5813019868	2	2	1						1				2			2		8	10	7	18	8	86	79	12
5813020118														18	9		1							1
5813020136																5	6
5813020347												1
5813020673																									8	6	4
5813020696												1	1													1	1
5813020785										1
5813020840																							1
5813020969																										1
5813020993									1
5813020996																												1
5813021094										1	1				1	3	5						1	2	2	1
5813021192												5		1											2		1
5813021196														1
5813021202					18	16	11	15
5813021217					13	8	10	26						1	10
5813021221														2													1
5813021225												2	1
5813021291																3	6
5813021336																	1
5813021480														2
5813021485												1
5813021535												1											1
5813021564																									2
5813021572																									1
5813021602																									2
5813021615							1	2				1		26	38	13	8						1
5813021632																	1
5813021666	1													81	71	2	1							1	1
5813021671														2	3	2			1				1
5813021882														1
5813021894																1
5813021899																								1
5813021943																									1
5813021948					11	2	2	11				1		2	3
5813022150														2		1	1
5813022182														2			1							2			1
5813022274												1		75	63	12						1			3		1
5813022429																												1
5813022453																1	5
5813022753	18	26	23	22	23	16	25	16						8	6
5813022839	1													1
5813023097				1		1
5813024125			1		18	8	13	16							1
5813024789					1	1	1	3
5813024792			3		4	2	7	2							1
5813025330					1	1	1
5813026385																					1
5813026579												1
5813026589												23	23												1	14	12	1
5813026613													1												2	8	10
5813026615									1
5813026661																									1
5813026718																									1
5813026773						1	2
5813026780																							1
5813027028														1
5813027244																12	16								1
5813027248					1
5813032640									2	5	4
5813032715					1
5813032849													1
5813032924			1																				1
5813033279					1		2	1							3
5813035064									3		1
5813035070												1	1															13
5813035213																									3	4	2
5813035242										2
5813035328									3		2	4	7
5813039660														1						1
5813039860										1
5813039875										5	1												3
5813039877										1	2
5813039902																											1
5813039910									1			1
5813039936																					1				1		1
5813039952																				1
5813040118																										1
5813040119											1	2
5813040216																							4	2
5813040224												1
5813040494					1	1	4	3							1
5813040707									1
5813040711																			2	1	1
5813040712												22	23															1
5813040731														2
5813040744	9	12	8	9	29	16	20	21						11	3		1
5813041131																							1
5813041244																	2
5813041426														2
5813044177																1
5813045601															1		1
5813046572		1		2	10	6	11	10							1
5813046674																			1
5813046951									1			1
5813046963																								1
5813046991										1
5813047012												1
5813047053																							1
5813047065			1										2			2	1		2		3		1
5813047101												1
5813047183									1										1
5813047188																										1
5813047189																	1
5813047284												6	12	10	31			2	1	1		1				1	1
5813047489																									1
5813047586	1	2	2								1							11	5	20	4	10	1	4
5813047713									11	10	5
5813047739									1	3	3	14	12	1								1			50	8	3	14
5813047774												6	1	1	1	3	3				1	1
5813049105																										1
5813049136														1										1
5813049438																		7	15	10	16	18
5813049907										1
5813050292						1
5813054835	13	13	19	22	1	1	1								2
5813055164						1
5813055734																				4
5813055748																				2
5813055759											2	3			1										2
5813055768									2
5813055790										2	1	2						3		1			2		1
5813055800												1
5813055813												1
5813055817									8	6	6	2	3	1				1						1	1	1	2
5813055822																			1	1	1
5813055853										1															1
5813055862																									1		1
5813055949												1														1
5813056020															2
5813056026										1
5813056028															1
5813056062									1		3	2							1	1		3
5813056072																7	11
5813056423															2
5813056759					1
5813056887									55	13	5	1	7	7	3									5	1
5813056917											2		1										2
5813056920													1
5813057148											1
5813057153															1	1							1	1
5813057319					2
5813057606					1	1	3
5813057615														2	6
5813057933												1
5813057973																											1
5813058028															1	4	3
[truncated: 118 more rows]
