# Supplementary material for: Connectomic analysis of the Drosophila lateral neuron clock cells reveals the synaptic basis of functional pacemaker classes
Source: eLife. 2022 Jun 29;11:e79139. doi: 10.7554/eLife.79139 (PMC9365390; doi:10.7554/eLife.79139)
Supplement: Supplementary file 2. — List of Body IDs of all neurons that receive inputs from currently identified circadian clock neurons and the weight of those post-synaptic connections. [file elife-79139-supp2.xls]

## Sheet: Table S2_20220309_clock_post_co
Supplementary File 2. Outputs of clock neurons
	sLNv-1	sLNv-2	sLNv3	sLNv-4	l-LNv-1	l-LNV-2	l-LNv-3	l-LNv-4	LNd-1	LNd-2	LNd-3	LNd-4	LNd-5	LNd-6	5th LNV	DN1a-1	DN1a-2	DN1pA-1	DN1pA-2	DN1pA-3	DN1pA-4	DN1pA-5	DN1pB-1	DN1pB-2	LPN-1	LPN-2	LPN-3	LPN-4
bodyId_pre	2068801704	1664980698	2007068523	1975347348	1884625521	2065745704	5813001741	5813026773	296544364	448260940	5813064789	5813056917	5813021192	5813069648	511051477	264083994	5813022274	5813010153	324846570	325529237	387944118	387166379	386834269	5813071319	356818551	450034902	480029788	546977514
203253253													1
203598647														1
233105330									1								1						2
234630133												10	3
234965803																				1		2
264083994														1	3		12								1
264438143																							2
264822904										1													1
265120424																							6	2
265120467																								2
265124786																								1
265155147																							1
266187342									1																1
266187383									5	3	6		1												1
266187477									2	3	2
266187480									6	1	1
266187532									1
266187559																									3
266191395																								2
266191407									2		2
266195641									1
266200011																								1
266527996										1
266528044										1
266528078									2	2	1
266528086									1	1
266847236																								1
266873389														3
266873591									9	6	14										1				1
267214250									15	8	12
267551614									1
267551639										1
267896360									2		1				1										3	1	1
268731005																												10
294424196										1
294428266		2											1											3
294432626																									1	1	1
294436967																1	1
294437347														1						1
294445804																	1
294760699													2						1				1
294783216	19	24	12	17													2
294791642																								1
294795822																							6	6
295063181	1	1		5									2	9	25							1
295103172													1
295132077																							1	4
295132551																								3
295132845																								1
295133015																								3
295133743																								1
295133778															1			2	3	2	1		16	12
295133927																								1
295136450																								1
295136668										1
295137392																							4	3
295137515																								1
295443724												1													1
295477467																							4	3
295477903																										2
295478389																							2
295793991	1		3							1													5	3		1
295802733										1										1			2		1
295814411																	1
295814630										1
295814932											1
295815100																									1
295815955																									1
295819998																							8	1
295820069															2
295849217										1			1	1	5			4		2		2	33	12
295849410																								1			1
296120593																								1
296139882										1													1		3	5	8
296153150																									1
296168382																							2
296194535									2
296199026									7	6	23							1		1						1
296203440												1												1
296358430												2	4															1
296502002											1
296505463																									2
296509709	4	1	1								1				3								6	4
296535619																							1
296535868										1
296543992										1													3	2
296544262			1											1	4								2
296544364										3	6					1
296829531									1
296838079																							1
296838229																								1
296841676																									1
296846314										1
296850634																							1
296851132																							3	6
296851235																							1
296851261																							1
296859399																							1
296859438									1			1							1				3	2	1
296863817																								1
296868077									2		1												1
296885362									13	2	2												2	2	2	1	1
297166197																									1
297221971									1	2				3	3								1	1		2
297230359									1
297230760									10	12	8														3	1	1
297239396										4	4
297243542									49	12	14	1		4	5												2
297247801														1				1
297251714												2		1												9	14
297251765									6	7	9
297502392																									2
297519807										2
297528741									1	2
297533212																							1
297541369	1	9	7	3												1							1	5		1
297558862																								2
297563139									3	3	3	5	4													1	2
297580512									10	2	2
297580589																									1
297584752										1				2	4				2	2		2	9	8
297584869									4	7	4
297588775									4	3	5
297588821									2	2
297588838									4	2	5
297588882									4	17	12
297588995									3	2													2
297593055									1	9	1				1
297899921									1
297908595																								1
297908801										2
297912117											1
297917158										3	5			1	1
297917363													2		1										68	3	9
297917474																									1
297917475										1	2			1										1
297921570																			1				3				1
297921608																							1	1
297921642													2
297921802											2
297925478			1						2	5	14			2		1	1
297925596										2	1
297925608										1			1												83	11	5
297925628													1	2												1
297925656									1	1
297925719									6	1	2
297925742										1
297925887										7	12
297929768									1						4								2				1
297929807									3		2
297929902									7		1
297930040									2	2	10
297930119										1	1
297934028									1	1
297934049									3	3	1
297934349										2	3
297938303									3
297938585									2		1				1				1		1	2		2		13	5
297947227									2	1	2	1						1				1				13	13
298055794													1									1						1
298197305									2
298201943									2
298214577																									1
298250090																									1
298254517												11	15		1										1	2	3	9
298258354										3	10															1
298258399										1	1
298258513																									1
298258714										1	11														2
298262408																					1			1	2	1
298262498									1
298262644															2	1				1			1	1	22	73	61
298262663											2														5
298266660														1											2	1
298266716									1		2
298266783									1
298266797											1
298266903											4													1
298266950									1	19	11
298270808									1	2	4														1
298275024										1
298275090									1
298275356															1											20	16
298279428									1
298279629									17	18	6													1
298288301									4	2	2														1
298542439									1
298586553										1															9	1
298590924										3															2
298591130									9	11	17	1											1
298599269									18	1	1
298599310									1
298599672											1																2
298603633										1	2	1														1
298607679																									1
298612190									4	2	1
298616588										1															22
298625276									10	5	5	1
298935769									4		2
298944620									2	1	3		2		1
298948785																							2	3			1
298952944												3	4
298957166																											1
298961895									5	15	4
298962041																										5	1
299043307									1	3	3
299043443									1	1			3															2
299272434																4	4
299289811																									5
299290105											2	2	1					5	2	4		3	1	2	21	47	52
299298593									1	1
299617529																								1	2	2	1
299621755																												5
324846570														9	8			1		2	1	1		1
325113795	1
325122109									1							1	1						2	5
325122525	64	60	71	56																			1	2
325446181										1
325455002	20	31	23	22																			1
325529237														14	12							2	1	1		1
325814461																10	2						1
325815440																									1
326119769																4	1										1
326137566																									2
326159897																									2
326164634											1
326253554															1			1	1	1		1	2	1	2
326460989												2	2
326465302												1											1	1
326508583																							1
326509224																									2
326530038												1											2	1		7	8
326542980																							4
326556230																											1
326560782														1	2
326817565																									1
326875404																							1	1
326888433									10	6	13							1			1					1
326888609																									1
326888675									2		2
326905710																									1
326905980									1	1	4
327225145																								1
327229641																								2
327242169									3	8	3
327242287																		1	1	1	2	1	36	53		2	2
327246381													1		1										1
327246931									3	1	1	1		1	4										1
327251085											1
327255181									3	3	5
327499164																									1
327532246									1
327584307										3	1
327587580									4	8	9
327587644									9	16	27			2	4											2
327588225													2												31	9	19	4
327588446									2			3	6	38	44			2			2	1		1			1
327592562														2	3						1		7	11
327596481									1	2	11
327600366									3	2
327843160	1											1			1								3	1			1
327872592									1	1	1
327928411																							1	1		3
327932807									4	8	11			1
327932921										2
327933008											1																1
327933027										1				2	13								2	3		5	6
327933061																									1
327933208									12	8	9
327933679									11	11	13																1
327933814									3	1	2		1	6	10			4	1	3	9	1	10	19	1		5
327937328											2
327937494									4	16	18								1								1
327937506																								1	1		1
327937628									9	1	9
327941614									1
327941844										1	2
327945864									2	2	1
328010530															1			4	1	5		1	2	2			1	1
328213824																							1
328244591																									1
328257630																									1
328264983																				1			1	1
328265182										2	2
328265389												12	6	2	1										20	21	11	2
328269766									7	6	2														1
328273806									2	10	20				1
328274706									5	7	6
328278125									2	1
328278368									9	4	4													2
328278449												1													2
328283406										1	3													2
328283521																								2
328283528											3
328287175										1
328291455										1
328373131												5	1	1
328551180									1
328559607									2
328611004									2
328628560											2
328632707										1				1	2									1	43	23	15	9
328709642									1
328714074									2	6
328714144									4	1
328718126												1
328883562									2
328909309		1
328935472																									2
328943204																												5
328952123												1					1								1	3	2
328955898											1												3		1
329050894															1
329206392																								2
329254539									1
329301513												1	12		1								5		5		2
329301762																									1
329310230												6	11	1											1	5	3	8
329395900									1
329396828									4			2
329566174																								1
329566197										4	9
329732855												50	27	62	27			1	3		1				1	2
329738037									2				2
329897255																									2
329966674														2		1									2
330074340																						2
330074405									3	1
330074628									6	4
330079329										1
330079381									1			1
330259272																									1
330260421												1
330316013											10	1													1		1
330319977																							1	2
330415160									2
330415332												17	16															2
330415373									13	3		1						1		1
330640044																									8	1	1
330661786																												2
331006655												2	2												6	1	2
331097097									2
331338959									4			2	2
331343089																									1
331774819												1													4			20
331774931										1	3
355453590	75	61	97	72
355816896		1										1	1			1	1								3	2	2
356136008												3	2		1					1					1	1	1
356140100		1	3									1	1	25	34	1	3			1			1	2		1
356153135																	4
356429209																							1
356472628														1										1	2
356472645	2	1							1	1		1				3	2							4	1
356472660				1									2											3	1
356499529																				1
356503889																7	5
356809556	2			1						2					1
356818551													2		4	3	3	1					8	2		2	3
356823065																	1
356835277		1								1	1				2								1
356913605																											1
357150583		1										1											1	2
357159104																1
357224041																2
357482735		1										2	1	1	1	3	2						13	11	1	3	1
357490931																									1
357515217																							2	2
357522097																							6	10	2
357569231																								1
357569362																								1
357573154																							2
357581846												6
357581860																											1
357599074																									7	2	1
357607932														5	1			1	1	1		2	1	1
357814777	4	2										2	1	2	1
357862532																							1
357863646																							3
357909813																							1	1
357923095														1	1						2		1	3		5	2
357932060	1									1				4	1						1		3	2
357940977											3	1		15	9			7	3	5	4	1		4		1	1
357944721										2		1	2	14	21
357944930	1																	3	1	2		1	5			1	6
357945095	1													2	3				2	1			3	1
357945155													2	1										2	56	19	20
357949102											1	1	1	21	21		1	5	6	4	1	8	10	28
357949364									3	2					3			2	1		2		16	23	1
357953145									1	1				1
358082499										2				1
358251878																								1
358264919																							1
358277352																				1
358281935				1									1	1	1			11	7	5	7	1				3	1
358281997																								1
358285424										5	9				1
358286194											1							1		4	1					25	29
358286442	4	2	11									1											4	7
358290805												1	1		1										6			21
358295017											4
358501372												1
358515278														1		1										1
358593042															6								3	4
358613806																								1
358627224																		1			2
358631295										1
358631384													1					1
358631450										1				2	9				1			2	3	3			1
358631537										2	2	2	2	3	3								2	2		1
358635284									1	2	7														1
358639742												16	30													1
358639884									1	2	7			1	10		1
358725902																								1
358847551												1	4			1									3	1
358879127												1					1
358890923																									6
358976440											2			15	27			13	10	8	6	9	12	19	2	1
358976515									2	5	10			2									1
358985893																		1
359027729									2
359317340																									1
359326692											1												1	1
359326764											1				2			1	1	1	2	1	15	12		1
359330004										1
359407882										2
359447314																							2
359560701																								2
359744616										1
359744768										2
359749513									3	7
360081309										3
360081407									1
360091049									1
360091238									2
360242173											1
360254108									12	15	15														1
360263797													3
360426854									3
360427510										2
360431375									3
360432213									4	2
360677632												8	11	11	2				2						1	1
360690414									2	11	13		1	2	3
360698817									14	4	3
360763630									1	1
360764170									5	3
360768754										1
361005850																									1		1
361040812													2
361104490																												1
361298637										3
361312146									1	9	3
361312808																									2
361355033											2
361376643																									4
361455153									2
361636071									2	4	2
361704572																									3
361722354													1
361787030										1		3	1															1
361791920									2
362019898																									5
362123158															1
362394990																							4
362473525												3	1				1	1		1	1						1	21
362719326																									1
362809689									1	1
362814519									1			1
362862047																												1
386506469													1												4
386829647														1
386833812														1		4							1		1	1	1
386833850													1	1	1	17	21						3	3
386834269	1											2		1	3				3	1				5	1	1	1
386838814																1	4
386847799									1		3			1									1	3
386877197																							3
387166379														13	14		1	2	2	1			1	2		1
387170738																							1
387180498												1					1						1
387503511		1		1										2	1								9	1	1	1
387507495																							1	4			1
387556524																										2
387943673																								1
387944118										1				10	9			1	1			1	3	3		1	1
387952104													1										21	3	2		2
388280297															1										3	2	1
388280529													2	4	1
388289013																		1			1
388289350																								1
388293040														1								1
388293048																								3
388293131																							1	2			1
388297625														1		4											1
388517539																							1	5
388605118																							1
388612388																							2	2
388612768																								1
388638672												3	3	1					1			1			3	3	1
388859011																								3
388877336																	1
388881226	1											13	12	9	3	23	36						1				1
388924424																1
388954086										1		8	2		2										2		1
388975834														1											31	19	13
388984132												1			1								1	1	3	3	9
389195896														1									4	3	2
389199936												1	2	4	8	4	5			1				2		1
389210230																									1
389247395											1
389286412																								3
389311717																							2	3		2
389325067											2
389419768														4	1				1		1
389419777												1		1	1					1
389419787														6	3
389527383																							8	43	4
389563849												1
389568268										1	1
389589423																							1	2
389626867																									1
389657555											1		1	1								1	2	1	5	43	59
389687699													1											1	3	1
389760846												2
389976940																									1
390003153										2	1
390024875									2	2	2
390024952									1
390097182									1
390101630															1						1
390101921										1
390280026																									16
390331583									2			33	30	72	65				1				1	1	1	5	3
390344371		2	3	4						1	6			1	1	3	2						1	1
390352384											1														1
390356988									2	1	4					3	2
390361224									8	5	13							2								1
390366259											1
390378650									1		1								1
390438574										1				15	9			4	1			2
390442730											2
390443308									1
390447010									2	6
390473497																				1		3
390579059																									2
390590450												1	2	1						1			30	27	3	8	4
390697959										1	1
390706983												1	1					2	1	2	2	2	6	3
390779758												1
390780035														1	1
390918452																							1
391016873									2					14	12
391026123												1			2	1	2	2	1		1	2	5	8	3
391034580																		6			1				1	3	4
391052159									5	2	2	2	1	6
391056169									1		2
391120561									1					1
391121449										2
391124880									3
391362634																3	4
391457659									5
391458054									2	3
391462340									1
391496898																												2
391618398																									1
391725625											1
391799282										1		5	4
391802788									1	1	1
392002352																							4	2
392062145											1
392130578																												23
392325925									5	5	2
392368893																1
392411222											1		4	1									1		46	14	6
392636270																									2
392748193										1	1
392821837									4	2	1
392822059												5	6															1
393063351												8	6	5	4										5	5	2	3
393158731									1
393162877										2
393215059																												1
393503853									2	1
393766777																									3
393776005																									104	12	14	9
394095053																									2
417143726														21	37		2	5		13	1	3	15	13	1	1	2
417190793		4										1	3	3	10		4	1		1			2		1
417199910											1												1	1
417204164															2								4
417204354				1							1			1	3	2											3
417221397														1										1
417536905										1	5			4	9								2			1
417540543														2	1	1
417554241																	1								1
417558532																1	2										2
417869138																								1
417882515														2	1	1								2	1	2	1
417890128														1		21	21
417908800										1		6	9	1
418224106	2	1	2													1							1
418224351																					1			1	1		1
418261858												1		7	2
418607328																							1
418641700												1		2					2	1			2	5		18	18
418645869												1	1	22	19			2
418650337																		1
418650351													2	7	2			26	32	21	36	30				2	1
418888180												1					2						9	33
418969956																								1	3		1
418987009																								5	1		2
419000001														2	2							1
419337157										3	4															1
419341292												1													2
419345466									3	1	2
419345606												3	2	1									2	1		20	19
419466429												4	4	2	1									1	3	11	10	12
419669180																								2		4	1
419669547																		2
419807055															3
420010739																									3
420027427	1									1				17	20			10	3	7	16	7	7	32	1
420027557									2
420036032																							1				1
420113535															1				1			2
420221276												1	1	1	3		1	1	1	3
420325753														1											2
420347328														1									1
420347360																							1	3
420351087														1	1				1				1	2	27	46	50
420351828									4	1			2	1												3	6	1
420359820										1
420382647														1						1	1			2			1
420386244														1	2			1				2			2
420454837																						1
420455015																					1
420571563														1										1
420586101												1	3	9										1		2
420688241																										1
420688294														1											2
420723066													2													1
420795489									1	1
420796184										1
420799910												1									1		2					1
420834927													1
420904348											1													6
421033734											3	1		16	9											1
421041565											1																1
421054850									1					2	3								8	28
421055181														2				2				1	2	25		1
421068062												6	6	32	39			3	2							1	4
421128142										2
421132639										1
421136849									1
421137065									1
421137107										1											2
421271305										1
421357275																									2
421405157									1					5	2			5	2	3	2	1	7	8	12	38	35
421469164									1	2
421469304									1	1
421477870														9	4			2	4		2	1
421605182											1
421746220										1
421810160										1
421810214									3
421814868												2
421815053									2	6				4
421946059																									5
422052346													7	3	3				2						6	5	4
422056521													1
422151417									1
422155460										3		1
422155824										1
422156254										2
422156333										3
422160219									1
422419397													3	12	5												1
422492727												1
422496798										1
422496879										1
422497047										1
422622063																									1
422777746									2
422833659										1
422833681										2
423101189												1	5													10	6
423174813									3	1
423183023										2
423442357									3		5
423516229											1														1
423792440																									2
423852469																									1			3
424037884										2
424193190																												5
424193645																												1
424443911														3									1
424452682																									2
424792976																										1
424793122																									2
424923616												1
425143700									2
425148091																									80	5	8	13
447599745																1	3							2
448182402	1	2
448234999		1								1	4	1												1		1
448238871				1										7	11			4	2	6	3	2	3	2		1
448260940	1								6		3									1			1	1
448515267											1							6	4	8	5			7
448942604													2														1
448994377																1
449236636																							6	11
449244969																											2
449285328																							1		1
449288517												9	34					1	1	1	1		1			1	1
449296930												1													6
449331241														1	1			1	1	2	1	1	1	2
449335798	1		1											14	24			10	5	4	6	10	27	21		2
449339510														4						1
449339532																					1
449339838																				3	1
449344351																			1	1						2
449490682																		1	3	2
449634539																									1	1
449681157	5	4	6	3											1	11	13	1	1				2	1		1
449685778														2	7			2				3		2	4	13	18
449910741														1
449975227												2		2	5									1	1	2	4
450008671																							12	2	1
450026507										1					2								1	1		6	3
450034796																				1
450034902															1			4				1	1	3	4		45
450035275									1											1
450164398																				2
450302778									1
450354788															4		1						2	1
450371612									2			1	1	3								2		2			1
450376017									2	1
450380493									2
450496881														1				1	1	3
450497246																		1				1
450497356																		2				3		1
450497386															1
450583886				1										2	2	4	1						3	6	4	1
450617762																							2	1
450656955									1
450700075	1			2						1	1		2		2	8	6							2
450807268												2
450838353																		6	15	5	4	6
451040974																									1
451049385																							4	5			1
451054039															2								1					5
451057982									2
451062462																								3	5
451071081															1												2
451071417									3		1				1											1
451080648																		1
451118413																		1
451148412																						1
451148508									1
451148559																			3	1	2	2
451148659													1	1
451148838												2	7	34	21			6	4	1	1	3
451279196												2													1
451356082										1
451365099																									1	1	1
451390676												3	2		1								1				1
451399140									1		1
451424866														2			1		1	2		3	2	3
451485030										1
451485434												1
451485461										1
451489835												3		1	1				2
451490214												1
451662040																									2	1
451689001		1											1	1					1		1		1	1	1	5	6
451722668												1	1										2	8			1
451735916									1
451762072															2							2					1
451765891															1
451822015										2		3
452158327															1
452158730															1
452162916												2	1	2														21
452167518													1	10	7			6	2	1	4	3
452167550										3
452167805										3
452171360														2	1				2		2	1
452171507												2		1	2			2			2
452171631										1										2
452171673										1
452504314														1
452509129												1
452771533														1					1				1	2	5	1
452771913											1									1
452841019												1	2	2	4													1
452841244															4
452841273												4
452841283												2		1
452845606										2		1
452849628									1
452849699										1
452953198	1	1	2	2									1	1
453130054												28	15												6	1
453185918										6		2
453195281										1
453423834																							2				1
453436589									3									1		1		2					1
453457927												2	1											9
453467404										1		1	1	3					1
453522986												3	4	14	6
453527730												1	1
453863806																					1
453868633										4
453873395											1
454003707																									1
454089465																										3	1
454217919										1	2
454477603												1													1
454481372																									12	5
454546908										2
454554631										1
454822542											1
455229034										1
455232361									2
455815977											1	7	2		4								1		24	2	3
455910660									3	1
455911138									2
456942698									1	2
477918443	1	7		3																1	2		28	41
478618011														1
478928628														1		1	5								1
478937243									1	9	10			1	2					1			1
479260891												1														4	3
479260921										3	2			1		1	1			1		1	8	7		1
479290982	2	1		1						1				4		3									1
479636867														1
479637825												1	9
479645393														1						1			1	1
479921537																	2						30	67	1
479935033																							1
479952665																1
479987085				2											11	22	15					1	2	4	2	4	6
480029788													1	1	2	1	1	1		1	2			4	2	30
480328501												1		3	2	1
480331310																							1
480378793																		1	1		1	2				4
480387478													1	7	7				1	3				1	3	9	19
480391822												1	1		6											10	6
480521256																				2
480521493															1
480521586															1
480525903																			1			1
480581727	1	1	3											5	3
480590566																1
480681197												1	2												4
480698453										3	2	1	2														2
480737286														2					1	1		3				1	1
480849477																						1
480854105																				1
480854134															1													4
480854154																				1
480857926																			1
480866929														1	3			1	1	1
480987689													4	3
481053136									1	3	2	1		1	1			4	13	3	6	2				7	2
481056857																							1			6	5
481070027												21	16	2				2		1				2	11	8	18
481190355												3		3					1	2
481190745																				1
481191030														1						2		4
481199594																			1			1
481199836												9	17	1	1				1
481204297																				1
481337148													1
481359062		3										1	1										22	21
481390070																										1
481394217									4	1	3		1	8	6											1
481406868												1	5	2	2											4	3
481410841																									4	1	1
481427934															2			4	9	4	4	5				1	1
481501073																				1	2	3
481501144									1										2	1							1
481532281														6	4			2		2
481747302												8	25												13	7	11
481770433																		1		1		1					1
481837842													4	2	1				1
481837848																				2
481838017																		1
481842257																		1			2
481842486													1	1
481846454														1	2			2	7	2	3	6
482071463									1			1
482174774														2
482178967														1								1
482179179																		2	1	1	1
482183354												1								1								1
482183384														1	3									1
482511406														3	5			7	13	24	13	20		1
482520165																		4	1	1	2	3
482520823															1
482520889									1
482524464												4	1	2														18
482754144															1								2	2	2
482783862										1	1		3		4
482805831																		1
482852299														1	2			1		1	1
482852401																							1	15
482856632																		1		1	3	3
482856872																						2
482861459												1		6
482869559										1
483142996													1		1
483189268																			1				1			1
483193732												20	14	3
483198033										1
483202128									1
483206709												1	5	7	5
483206849															1			1	2	5		1
483337285																								1
483457318										2
483539538										1
483547827										1
483646991																									1
483879756									2
483880436																		1							1
484126552																									11
484213034												5	4
484217280										2				1
484350664																1
484355328												4	1
484501839														10	6
484553282																		2
484554412												6	3	1														6
484562428												2	2	1	1
484566597														4	2				1		3	5
484829654														1											11	1	1	50
484838760												2	1	2	8
484890037									1	1		1	2	25	10			2				1						1
484898739																			1
484903376										1
484911881													1															2
484911954													1
484942773												3	1
485171425																									17	3	2	44
485231414																												1
485249150													1															11
485252796													1
485499217																									2
485511772									5	2	1			1	1								1	2			1
485568100									2	1
485572658									2	2
485576944																				3
485580811									2
485589846																												1
485628489															1													1
485745069													31
485930943												3	3
485930996																												1
485934965												12	7													1		1
486103577									5	2
486255488									9	2	4
486646991												8	5	8	7			1		2		3
486842208									1
486867877																									1
486876782												1													1		1
486932201																									4			30
486941224										2
486945479																												1
487212916																									1
487290306																									5
487541595																									1
487636204									4	5
487887067																									7
487899426											1
488231939																											2
488572496													2	4	1										3	1
509626405		1	1
509626609		7
509631101														4	10			7	7	11	4	6	1	4
509643775														1	17	3	5	1		1			5		8	5	1
509945954													3
509968249																									1
509993739			2												1								1	2
510602264															1		1
510676580																							3
510680365																5	12								1
510680957										4	6			2	1
510987433																									1
511051477					1		2							37		55	63	25	25	33	22	25	2	4		1
511056466															2											3	2
511068685																											1
511219394																			1
511219601															1			3	3	1	1	6
511353266													2										6	4
511358390																											1
511422245																				1						1
511543135																				1
511547921														5	1			1	5	1		5
511556310														1						1
511561200																				2
511681569	1													1
511685969												1
511686666														1
511699812	4		5	1
511733723																							2
511772101												4		12	7			4	7	11	8	5				4	1
511862444																		3	3			1
511875377																		1			1
511875414																		1
511875446																		1
511879849																		1
511889371														1	1
511901988														1
512014262												8	15	2	2
512048416																							2		4
512079523									2	2	1				2									1
512100489																										2	1
512122154																		2	3
512122177														1					1	4		3
512207845																						3
512207847														2	3				3	3		3
512207870														5	2			1
512212113																				1
512212128														1						1
512216447													1							1
512216460													1							1
512216491														9	4			4	2	1	1	3
512225306																				1
512225656																				1
512225867														6	2			1	1	1	6	1
512243445																				1
512377806														3												1
512411244																										2
512411317																									1
512441111												10	22	1	1										18	2	2
512441442												2	1												34	16	33
512535936												1
512536036																				1	2	2
512536060																			1
512536126														1	4				1	1
512557531													1									1						2
512566365																		2
512566853														1	1
512566925														1
512774096												2		1												1
512782759														1										1	4	10	7
512787296												10	10												8	2
512872629												3		1	1				1	2		3
512872831												1			1
512873031												2								1	1
513209746																					2	2
513209805														2							1
513214039												1						1
513218590												1
513344531										1		3	5	1												1
513464860											1
513551146															1				1		1
513551342									1	1		1							1
513555079																						1						1
513555436																				1						1	1
513668146												12	6
513788774																								1	8	3	1
513840103															1
513848395											2
513887511														1	1
513887940												1		4	2			2				1
513896195												1	2	2
513900305									1
513904588																					4
514068564																3							1	1		4	3
514219793																		2		1
514224681													1	7	5			4	7	5	2	2
514225046																				1	1
514271457																												2
514272175																							1
514475106																										3	3
514522242																								2
514527219										1				1
514530554																			2
514561054														1
514565269																												2
514565428													1	7
514569836														1
514583142														1
514807275											1
514842241											1																1
514859045				1										5	3			5	5	7	4	8	3	2
514958793																												1
515247194									1	1				1							1
515247907													1
515251693												13	7															8
515385637																5	1					1		1		1	1
515580115									4
515588291												7	14															6
515852217																									5
515869245																									1		1	1
515925122														2				3								1		1
515947324												2	5															2
516055524															1
516163285																							2		1
516214576												5	3	1											7	1	1
516288489												7	8															17
516857964													1
516875221												6	11												30	1	2
516943720									3	1
516943929										1
516965856												7	4															12
517242832																										1
517280671														1
517358921									3
517647609									3	2
517652222												3	2															1
517682957																								1
517872280																									1
517902689														1	1										2		1
517910959																									5
517916020										2
517928417											1
518576422												2	6	10	1
518580489																		1	1
518899771																									7
518917592																									3
518930199												1
518947623											1
519275692											1
519279166																									2
519339923										1	1
519591210																									1
519940322																									3
540001084																							1
540325242												1	2	12	28			1	6	6	13	3	15	36	1	1	1
540329317		2	2									1		2						1			16	10
540657374																9	6
540662210																	2
540674783				2										2	2		1						1	1		1
540679089													3	2	10	16	25						1
540998783																12	8										2
540998882	13	18	13	13								3	2		1	35	29						1	1		3
541007502									1							1	1
541011631												1
541373868															1										1
541378802	5	6	9	7									1	5	4	17	19						1			1
541663112																	1
541681271														1											1
541697718												2	1	3	2
541723731												1
541732518															1							3
541741406																		1		3
541913280												1																1
542056766	1	3		1										4	1	2	5
542103594																								4
542103645																		3
542104127																			1							2	1
542111941																							2
542410481												6	1
542423139																							1
542457618															1								1		4
542573741															1			1	1	2	1
542578154																		1
542691005													2												1		2
542734736																									1
542747457														1									7	5
542751938																							1
542781165																			2
542798778																					1
542902307																		1		2	1	1						1
542906401																		1
542906584																			1			1
542910915														2	1			1	2			2
542910924														1					4	2
542923445														1
543010474																							1	2
543023799													2
543049093												4	9
543062097														1		7	8								1
543092817												13	5												1
543135607																								1	6	6	8
543234229															2			3	3	1	2	5
543234427																				2
543238468																												2
543238882																						1
543243444																						1
543247309															2
543247387														6					2
543247616																			3	1
543247668																			1
543247684																			1		1		3	3
543247857													2								1
543252056																					2	1
543255853																			2		2
543256347												6	2		4			2			1							3
543365167	2	1											2		2	15	11		1		2	1	2				1
543498242																										1
543566744																						1	6	10	1	2	1
543566772												3		6	4			1		2
543575336																					1
543579922																					1
543580198												4	2
543580245																					1
543583771																			1
543584240														1								1
543584523																		2	1		4	2
543584751																					2
543588162														1
543588915										2
543589080															1			2			2
543692985																1
543702186								3
543718301																								1	1
543808842												2		6	3
543821838													2												1
543907986																				2		1
543912097																		1			1
543916401										3				4				4	5	4		2
543916894																					1
543925435												1	1
543929121												1		5	3			2			1
543934592																												4
544038123																											1
544145565															1
544158132																						1		1
544158940																									28	3
544171197											1
544184932																										2
544240309															1			3	4	5		1
544249066									3	1		1
544262349												19	17	1														3
544265891												4	6	2				1										2
544265926																												1
544265948																												1
544266001																												3
544266246												1																2
544270890																												14
544270910												3		1
544274492																		1
544512309																								2
544534612														3						2
544594211														1
544599100													1	2
544602598									2	10
544602710										1
544606883																												1
544607508													1
544611593												2	2		1													1
544611771												1
544611801																												4
544615880														5
544620289												3	2	2	1
544831533														1
544840037											3
544857968											1
544918228																				1
544918416																			3
544931723										1
544939669										1									1
544939871												2	1
544943610										5
544948071													4
544952587																												4
544953224																												2
545254708														1	4
545259664														1
545263525												1
545263627												1
545280478									1	1			1
545289772													2
545293434																												5
545444996																									1
545501062													1						2	2			5	4			2
545608742									2
545612931									2
545617845										1
545621581													1
545621597										2								1			1
545621779													1
545625956										2
545629975										2
545630021												2
545748103												4	1
545872467																									1
545903200												1														12	16
545906392																							1
545907195													1													4	3
545933292																		1		1
545941764																												1
545962610													1
545966742												1	2															1
545966857													1
545967081												4	3
545971070													1
545971266																												1
545971650													1
545975516																												1
545979714																												1
545984286													5
546217818												1	2												49
546234932														4	2			1
546287086												6	5	3	1													1
546312139																						1						1
546312597																												4
546316510																												6
546316520										1
546316765									1	1
546559025																									1
546640628																												1
546641024										2
546641044																									1
546645399										1		2
546653091																												2
546653603													1
546657497										2
546917498												1	1													1
546925626									1															1
546956605													1	2
546981769																												1
546989946																												3
547002880													1
547240545												4	5
547258283													1	3									1			1
547310321												8																2
547318372																												1
547331124																												2
547612423										1
547659598																					1
547664568																			1
547676867												1	5
547918570																								1	1	4	3
547927681												1	2	1	1
547936371																									3
547978595									3										1					2
548017378																												1
548225503																									2
548272677																									1
548342008												7	6
548367551																												1
548367581																												1
548371852												1	4
548571023																									1
548678665																												1
548691397													1
548699489																												1
548704181																												2
548712377																									25			1
548718223																												7
548718249												7	3	4	2
548722401																												6
548949855																									2
548972278											2
549032565																												1
549049279																												2
549175510												1
549347735															1
549377313														8
549377612												1		1
549381505																												2
549597974																									2
549611256									1	1	1
549714149																												9
549718224																												8
549718269																												2
549726953																												2
549735839																												1
550033958											1
550063586																												13
550063644																												1
550275952																									2
550280614																									6
550297695														3		1	1						10	10	2	16	35
550322829											1
550326974																									3	1	1
550400302												1
550404686												5	2
550408962																												6
550617370																									1
550629848																									2
550750102																												2
550988122																									1
551090979																												4
551410783																												2
551436366																												1
571018594	5	8	1	3
571018713	5	1	1
571346836				1										1		2							2
571346887											1														2
571355851														1
571364144									1	4	17		2			1							1
571364778	3
571368849																7	3	3	1	1		2	3	7
571372889	6	8	10	8										4	12	19	23							2	1
571376785																							2
571376908																							2
571381258																								2
571692839				1											9								8	10
571709547									3	6	3		1	1	3	1				5	1	2	15	25
571713905											1			5	22	34	23						6		12	1
571726583																							1
572051031												1
572076327																							2
572754059														2		1
572758750																		2		1		1
572780218																							1
573090850																	3						4		1
573142557		1	2	2										1	2			3	2	1			4	2		2
573142803														3	2					1				1
573143028																							1
573151229																							4	7
573289509															4
573289993													1
573449228																							3
573618167															2
573627110													1
573774122																	1
573825361																									3
573833492														4
573833723													3
573837867																										6	2
573937163												4										2
574062996														2		1		2	4	4	2	1	4	6
574161719																										2	1
574377845																2
574395611												1	1	4	15	25	38						1	1	1	2
574511458												11	13	1	2						1	1						2
574515806												6	1	1									2
574601891														1
574736017													1
574740549														2
574882311																		2		3				5
574955896													2
574969092													1
574973454												5	4	2
574978101														3
575197482										1
575301459												1
575305924												2	3	1														3
575323308															1
575564352																				1	1		2
575573640															1
575612047																				1
575620465														1
575647041												1
575651309												6	7	6	1
575768294																1
575915136															2
576079106																4	2
576082257												9	17	5													1
576208238																										1	1
576216182											1
576243061												1	3	1
576260070											4			2
576319940										1
576574889													1													1
576683512													2
576985092												1
576999054									2
577244511												4	7	8	2										1		1
577330676																												3
577554935																												2
577624125																				1
577709776																												1
578016879																								2
578254032																										1
578284233												1	2												22	1	1
578587259												3	3	4	1
578587420																									1
578621125													1
578642656										2
578686468												3	1	6	2
578698726														1
578919867															2
578970891																									3
579014562									2		1
579239039																											1
579575594																									1
579700707										2
580071186												1
580348303									2		2
580662960																									1
580714587																									1
580719155									4	7	4
580732172																												4
580732377																												1
580736603																												1
580745387												1													1
580987056																									3
581004609																									2
581055513									6	3	9
581073524																												1
581409749																												1
581432310												9	9	2	1
581436615												1
581755530										1	4
582381047																									1
583132200																												1
601712799			2
601712813																								1
602044783		3	2	1
602071049	6	5	3	6											5		1			1					2		1
602382052																1	1
602399280																				1
602645152											1					2	1
602675369	4	2	2											4	16	43	46						4		7	4	1
602723103																							3	8
602749386																											1
603068370												1
603095061									1						1									1
603466235									1																5
603482385			1													1										2	1
603785283																											1
603824120																								1
603824307																							3
604070461																2	1
604182144																									1
604194925	2	4	6	2						1		1											4	1
604195063		1	5	1										1	6	1									1
604195247	3													1	1	1	1	1	2	2	1		1	2	1	5	2
604476368																											1
604510234																							2
604510524																									7	1
604527772																											1
604634863																			1	1
604652566															1
604847018																										1
604856102																									6
604864322												4													4	5	15
604864392												6	8	5													2
604868757													3
604877772																										8
604886083																							1
604889732																							14	6
604976663																												1
604980831															1
604989814												9	9	1	1													5
604998092																												4
605154073													1
605317863										1			1
605550395												29	15												1
605554875												2	11
605654689																												1
605662705												14	7	1														2
605662755																												1
605775210														1		1
605994959												8	8		1
605999323												7	5
606193500																1
606340818												1		3
606603565															1
606914301											2
607010448										3
607260192																									7
607273128												7	13	11	7										4	1
607273339												1	5	8	4	1									1
607294784																				1
607346347													1
607635892																						1
607929192											1	6	16	1				2		1	1		3			7	3
607938091																1
607955261												2	1
607998424																				1		1
608042044												2	1
608261812												1			1
608278754											2	9													1
608301148																									9	1	1
608347901																		1
608602824												7	6
608715651												5	5															39
609000216																									1
609384093												6	16															6
609587511																									2
609591758																									1
609591880																									5
609591989																									1
609655670												16	35	10	2										3
609656444													2
609773847																												2
609993550													2
610018976															2
610049447										4	3
610074665																												1
610385481										1
610415691												18	12															20
610666582												1	8												5	1	4
610704870									1	1
611015907													1												1
611016455																									2	5	7	1
611029037																									24
611067721									4		1
611089612												4	7															1
611340150												11	30	3	1										1	1
611974080																	1
612073194										2
612121276										3
612134763																												1
612358673																									2
612695501																									6
613040803																									1
613161596																												3
613179816																												1
613822435									1	2	6
613873982																												1
614189799																												1
633093547																1	6
633097767															1	2							1	2	1
633097828																78	70
633101926													1
633412502																								10
633412554																							2	8
633438933																3	1
633447458																	1
633793553				1												68	71								1
634501239											1
634867234																								1	1		1
634879889			2	1								1			4	2								2	2	2
635523991																									1			2
635540653																								2
635541640															2									1
635545357																									7
635860358														1		2									1
635878327																									1
635895000												2	1													1	3
635903360																										1	1
635903433																									3		1
635903703																									1		1
635907365																											1
636244893																											1
636248936																										5	2
636344136												1		12	3			3	2	2	2
636356423													1	1														1
636589318												1
636594376														1		7										2	1
636602582												2													1
636667489														3
636926507																											1
636944318														2											12	2
636947974																											1
637034367																												1
637047419																												1
637280110												1
637289438													4
637306291													1	1	4			1	4	1			8	16
637371565																												1
637371568																												1
637621553												1	2		1
637673302																		2				1
637699424												1
637914938			1													2	6								4
637949445											3
637957861															1
638040562														1
638057952												1
638316334																										4	1
638360015													1	1
638740232													1
638985608																							1				1
639007697																										2
639008013														6	1
639050664																												2
639063702												1	2													3	4
639327084												3	4												6
639405054																												1
639650941												6	4
639655378												1
639659397												4	7
639667528																										2
639995972																									3
640082371																												2
640104852																												1
640427907																												1
640539567													1
640596169																								2
640691030												2														1	2
640691209																									27
640755994												14	16	16	1													5
640760406												7	6
640963092																									1
641057518																												1
641105431																												2
641110014																												1
641403248										1
641688553																									2
641701225																											2
642033429																									4
642046803												1																1
642085399										3
642146802																												1
642262407																							1
642387793												1				1
643156727												1
643393020													3
643393688												1
643401816																									4
643502099																												1
643860525																												1
644433538													1
662197764																							7	3			1
663432544																1	2
663437249														1			2
664128120																1
664447502														1
664456036																									2
664490596																	3
664824047													1				1								4
664827233																	2
665466951													2	4	2
665552356									3	1	3												2	1
665556968	2	7	2	3								1		1	2										1		3
665820084														1
665897487	3	1	6	3											6	1									3
666162219												2		1
666230992																									2
666252297																1
666555064																								1			1
666575508																								1	8
666618877													2
666916874																	1
666942629																										1	1
667266529															1
667486204																1
667599306																								2
667603691																											1
667620012																										7	2
667642283													3
667711365															1
667750417																									1
667965556												1
668056654													2
668065234												7	4	1
668311132												1
668340913				1												1	5						1		1
668384542												28	30		1													7
668397992																					1
668652267												1
668660617														1
668742424												1
669066952													2
669075559												2	1	1
669355635													1
669403115																												2
669421910												1		1														1
669675454												4													2
669683969																									2	1
669697117																											1
669739832													3		1
669744300												20	9	2
670020922												1	1
670024927																							1			1	1
670072514															1
670077134														2	2
670094261												6	2	2														3
670111641													2
670353202													1
670357457													5
670370149												4													1
670370239														2	1
670370808												2	3												2
670430840													1
670430945												5	8
670431030												26	46	1	2													3
670435190												1	1															1
670435566													2
670448503													1
670448622													1
670711621																									2		1
670772147												40	25															4
670776253												2	5															3
670776480												4	6															9
670883838												14	8
671234167													1
671393987																									1
671401894																											2
671449467												1	4															2
672248510																							1
672490308												5	2
672835284												1	4
672960748																									1	1
673072855												1
673189141																												1
673513595										1
673746277																									2
673758836													1
673867858												7	6
674108632												24	26
674427795													1
675490252																									2
675767414																									1
675940037																												1
676262737																												1
694463250																	4
694471913																1	2
694472338																6	2
694813336																3	2
694813676																7	5
694818168																	1
695124651		1						8					1	1	7
695128320												1		2	1		1
695128641																								2
695128703																								2
695132361														1		1
695154095																3
695154667																3
695172463																1	1
695465316																	1
695469100														1									3	2
695508439																									1
695798021																1
695875649																	1
696215925																							1
696216553																							1
696489026																1	1
696829800																	1										1
696846594										2	2				2	2	16							1
696850811			3													2
696859236														1
697252464																	1						1
697265869															2	1									1
697269889																									2
697295304																										2
697645622		4	5	3									2		1								7	8		2
697886966												2	5
697925511																							2	2
697985761																									1
698072467														1
698224251													2													1
698314499												4	8
698331117																									1
698418398												1
698418640												2	1
698677285																										4
698742094														1
698970725																3	3
698996246												6	13
699031185					3		1	1	1	2													1
699078755																												3
699363923												16	16												1
699687305												18	22	2	2												1	2
699695617												2	4		1
700002191																								2
700028161																									2
700037217												14	11	1
700437926												1																2
700731556																									1
700779022																												6
700801298												6	7
700805759												6
701051650												3
701055731																									8		5
701077130															4
701120315													1
701151126												4	1
701409339																											1
701469455														2
701474029												1
701742479												1
701746442												1
701746512												3
701750547																										3	1
701759740														1	1
701806850													1
702152113												25	39
702760942												2
703179782												1
703779386												4	8
703866010																												1
704453006												3	2
704487840									3																1
704552421													1
704880200												1	1
704898746													1
705229969													3
705243675													3
705938591													1
706831482																1
722471825															1
725498630																1	1
725817857														1
725839388																	1
726171930																2	2
726184776																3
726207450																	1
726867105																2	2
727182822																								1
727212462																2
727255451																1
727260771													1
727280915									2		1													1
727285326														1	1
727929407														1
728205616																	1
728292005																									1
728342932																									2
728633073																1
729137627																											1
729444443													1
729698667												2	11
729711951																									5
729715904																										2
729716051																											1
729781112																												6
729785519													2
729790291												1	1
729954382																2
730104740														1
730118077												5	2															6
730130818												2	1
730131007												15	5
730398148												3	3															1
730398229												3	11
730475736												1		4
730717696												1
730721558												2	5
730743732													1
730791480																												1
730804352													1
731062953												3	12
731140650												11
731140809												36	18
731145160									3	1		13	10
731145304												4	3
731482010												14	5
731494823												10	1
731831926													1
732077752												1
732086360													2
732155427												1																1
732431788												4	1
732496591												1																9
732777416												4
733182574									2	7				1	1
733192083												2	3
733873838												1
734327429												2	7
734547253													1
734901302												1
735816081																									2
737189212																							1
738155917																									1
739567785																								1
756502912															2	3
756623488													1
756870190																1
756874510																3	2
757215581																1
757556799																2									1
758320421																									4
758636869																1	3
758903321																	1
759136185												1
759632919															1	2
759633968																									1
759792147														1
759810119																	1							1
760133472														1
760293208																								4
760470777																												2
760487313												6	1
760690116																									2
760821030												9	5
760828908												3	2
761013909																							2
761083880												5											1
761088041													1
761165432												17	7	4	1
761174130												1
761441765															1
761489398													2
761744194																									1
761813205																						1					2	1
761838951													3
761843188												3
762119200													2
762176004												4
762184774													1
762525980												19	11
762526201												3
762534597												1
762810507														1
762857726												22	8
762857949												16	6
763544185												6	3
764144161												5	1
764148834												13	8
764222141													1
764843337																									3
765245188													1
765590602												4	3
765931172												5	6
766385396												1
767313008																									1
767455273																											1
767878191																								1
768582563																									3
769544445																							63	46
770257411													1
787882939		1												1										1
787883174																									1	2
787883482																									2	1
[truncated: 902 more rows]
